# Supplementary material for: Both ATM and DNA-PK Are the Main Regulators of HIV-1 Post-Integrational DNA Repair
Source: MDPI journal article supplement (doi:10.3390/ijms24032797), 2023-02-01
Supplement: s1 [file s1]

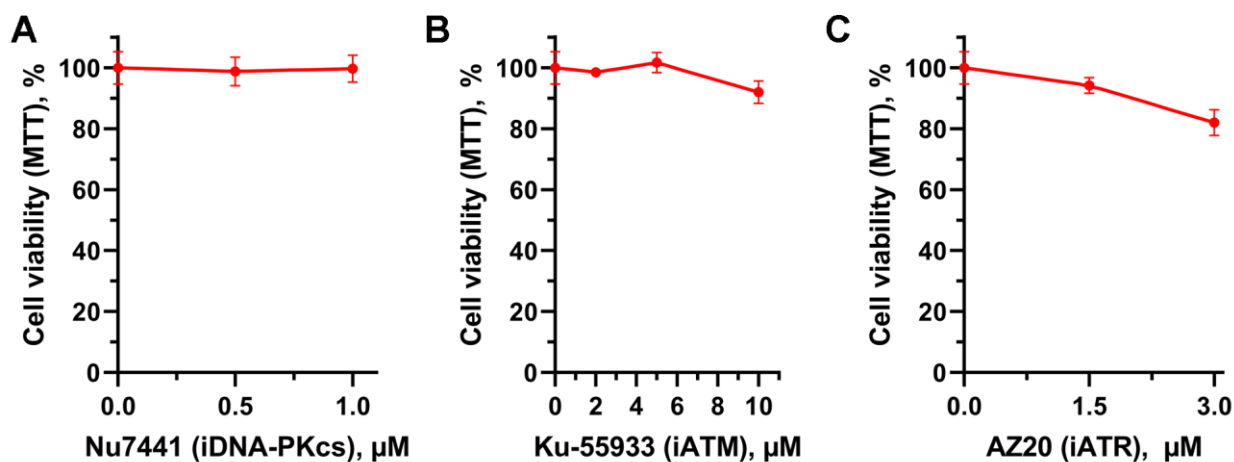

**Figure S1.** Cell viability (MTT-assay) in presence of (A) Nu7441 (iDNA-PKcs), (B) Ku-55933 (iATM) or (C) AZ20 (iATR) measured 24 hours after inhibitor addition.

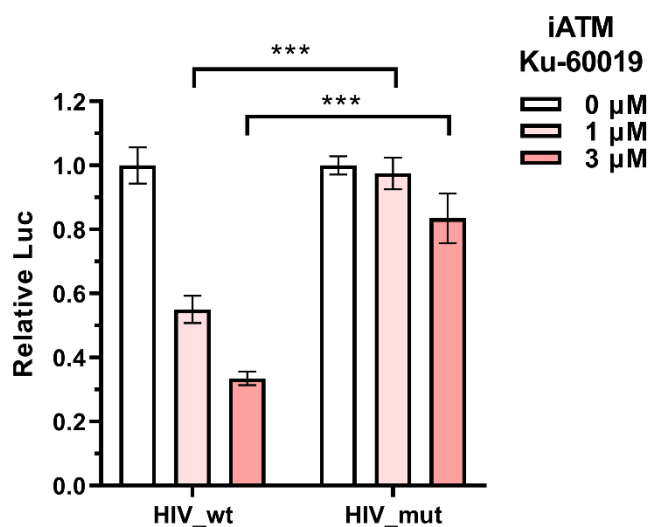

**Figure S2.** Effect of the ATM inhibitor (Ku-60019) on luciferase activity in 293T cells transduced by HIV\_wt and HIV\_mut. Mean values  $\pm$  SD of two independent experiments are presented. Significance was determined by Two-Way ANOVA with Sidak's correction for multiple comparisons, \*\*\*=adj.p-value < 0.001.

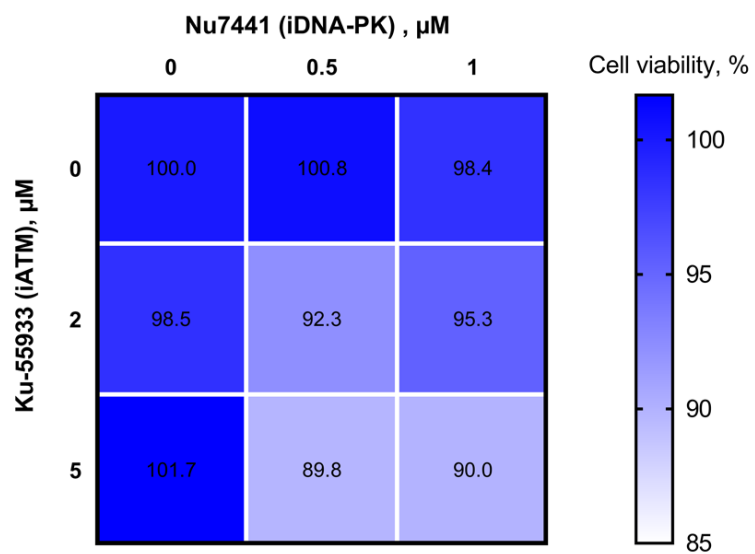

**Figure S3.** Cell viability (MTT-assay) in presence of Nu7441 (iDNA-PKcs), Ku-55933 (iATM) or its combinations measured 24 hours after inhibitor addition.
